# Supplementary material
Source: PubMed Central journal article supplement (PMC3070599)
Supplement: NIHMS278719-supplement-Suppl_Table_S1.pdf [file NIHMS278719-supplement-Suppl_Table_S1.pdf]

**Table S1. Thirty Most Significant Association Results From the Analysis of Nicotine Dependence in the Dutch Sample**

| Chr | Location (bp) | SNP        | Gene           | SNP Type    | P-value                  |
|-----|---------------|------------|----------------|-------------|--------------------------|
| 15  | 76161636      | rs11631180 | <i>TBC1D2B</i> | Promoter    | 4.264 x 10 <sup>-6</sup> |
| 20  | 38475285      | rs3092155  |                |             | 4.371 x 10 <sup>-6</sup> |
| 7   | 154997865     | rs6459707  |                |             | 8.485 x 10 <sup>-6</sup> |
| 7   | 154996933     | rs6971850  |                |             | 1.145 x 10 <sup>-5</sup> |
| 5   | 141168499     | rs17097654 |                |             | 1.269 x 10 <sup>-5</sup> |
| 5   | 39249453      | rs696748   | <i>FYB</i>     | Intron      | 1.531 x 10 <sup>-5</sup> |
| 10  | 28774361      | rs7085106  |                |             | 1.695 x 10 <sup>-5</sup> |
| 15  | 76136405      | rs12148365 | <i>TBC1D2B</i> | Intron      | 2.060 x 10 <sup>-5</sup> |
| 16  | 51113243      | rs8046979  |                |             | 2.300 x 10 <sup>-5</sup> |
| 18  | 7509001       | rs576192   |                |             | 3.056 x 10 <sup>-5</sup> |
| 6   | 106644483     | rs6923608  | <i>PRDM1</i>   | Intron      | 3.204 x 10 <sup>-5</sup> |
| 18  | 7478970       | rs567338   |                |             | 3.700 x 10 <sup>-5</sup> |
| 11  | 2743637       | rs231872   | <i>KCNQ1</i>   | Intron      | 3.720 x 10 <sup>-5</sup> |
| 15  | 96426216      | rs12148124 |                |             | 3.759 x 10 <sup>-5</sup> |
| 3   | 188453990     | rs3105782  | <i>MASP1</i>   | Intron      | 3.850 x 10 <sup>-5</sup> |
| 15  | 76131977      | rs4886554  | <i>TBC1D2B</i> | Intron      | 3.869 x 10 <sup>-5</sup> |
| 18  | 4016587       | rs1372631  |                |             | 4.131 x 10 <sup>-5</sup> |
| 5   | 158920307     | rs17729321 |                |             | 4.171 x 10 <sup>-5</sup> |
| 18  | 7481478       | rs533682   |                |             | 4.237 x 10 <sup>-5</sup> |
| 12  | 104628953     | rs4590982  |                |             | 4.240 x 10 <sup>-5</sup> |
| 5   | 160228811     | rs12188645 |                |             | 4.421 x 10 <sup>-5</sup> |
| 11  | 2707296       | rs2283214  | <i>KCNQ1</i>   | Intron      | 4.527 x 10 <sup>-5</sup> |
| 20  | 1558939       | rs3746722  | <i>SIRPB2</i>  | Coding exon | 4.571 x 10 <sup>-5</sup> |
| 12  | 12037208      | rs12582693 |                |             | 4.596 x 10 <sup>-5</sup> |
| 7   | 147310468     | rs11771941 | <i>CNTNAP2</i> | Intron      | 4.874 x 10 <sup>-5</sup> |
| 7   | 147294425     | rs2178771  | <i>CNTNAP2</i> | Intron      | 4.990 x 10 <sup>-5</sup> |
| 12  | 74699761      | rs7297654  | <i>PHLDA1</i>  | Downstream  | 5.087 x 10 <sup>-5</sup> |
| 11  | 2707861       | rs231910   | <i>KCNQ1</i>   | Intron      | 5.102 x 10 <sup>-5</sup> |
| 20  | 1560819       | rs1535883  | <i>SIRPB2</i>  | Intron      | 5.386 x 10 <sup>-5</sup> |
| 8   | 87695579      | rs2362267  | <i>CNGB3</i>   | Intron      | 5.752 x 10 <sup>-5</sup> |
