# Supplementary material
Source: PubMed Central journal article supplement (PMC3070599)
Supplement: NIHMS278719-supplement-Suppl_Table_S2.pdf [file NIHMS278719-supplement-Suppl_Table_S2.pdf]

**Table S2. Thirty Most Significant Association Results From the Analysis of Alcohol Dependence in the Dutch NESDA Sample**

| Chr | Location (bp) | SNP        | Gene             | SNP Type          | P-value                |
|-----|---------------|------------|------------------|-------------------|------------------------|
| 6   | 90731172      | rs16882302 | <i>BACH2</i>     | Intron            | $2.278 \times 10^{-7}$ |
| 22  | 46049871      | rs11090754 |                  |                   | $2.161 \times 10^{-6}$ |
| 21  | 42006728      | rs13051745 | <i>C21orf129</i> | Intron (boundary) | $4.778 \times 10^{-6}$ |
| 13  | 83474030      | rs9546562  |                  |                   | $6.829 \times 10^{-6}$ |
| 10  | 43383818      | rs2393938  | <i>ZNF239</i>    | 5' UTR            | $7.126 \times 10^{-6}$ |
| 10  | 43371825      | rs10793442 | <i>ZNF239</i>    | 3' UTR            | $7.640 \times 10^{-6}$ |
| 10  | 43370721      | rs7893169  | <i>ZNF239</i>    | Downstream        | $7.640 \times 10^{-6}$ |
| 10  | 43374973      | rs7894102  | <i>ZNF239</i>    | Intron            | $7.640 \times 10^{-6}$ |
| 10  | 51231805      | rs17178655 | <i>MSMB</i>      | Intron            | $7.784 \times 10^{-6}$ |
| 13  | 83489863      | rs9546566  |                  |                   | $1.023 \times 10^{-5}$ |
| 22  | 19654308      | rs178260   | <i>AIFL</i>      | Intron            | $1.365 \times 10^{-5}$ |
| 14  | 68270943      | rs8019389  |                  |                   | $1.956 \times 10^{-5}$ |
| 1   | 218174540     | rs12129498 | <i>SLC30A10</i>  | Promoter          | $2.706 \times 10^{-5}$ |
| 11  | 16791086      | rs216495   | <i>PLEKHA7</i>   | Intron            | $2.880 \times 10^{-5}$ |
| 19  | 41939312      | rs826969   | <i>MGC62100</i>  | Intron            | $3.146 \times 10^{-5}$ |
| 4   | 109150488     | rs4956145  | <i>HADHSC</i>    | Coding exon       | $4.110 \times 10^{-5}$ |
| 7   | 4162514       | rs619672   | <i>SDK1</i>      | Intron            | $4.593 \times 10^{-5}$ |
| 3   | 110120120     | rs2715689  | <i>GUCA1C</i>    | Intron            | $4.905 \times 10^{-5}$ |
| 13  | 29542418      | rs9314995  |                  |                   | $5.051 \times 10^{-5}$ |
| 5   | 118701596     | rs17164572 |                  |                   | $5.286 \times 10^{-5}$ |
| 5   | 118703145     | rs3813301  |                  |                   | $5.408 \times 10^{-5}$ |
| 5   | 118695541     | rs7704398  |                  |                   | $5.408 \times 10^{-5}$ |
| 6   | 83427171      | rs376096   |                  |                   | $5.557 \times 10^{-5}$ |
| 1   | 94889745      | rs947386   |                  |                   | $5.675 \times 10^{-5}$ |
| 6   | 46050909      | rs3777599  | <i>CLIC5</i>     | Intron            | $5.699 \times 10^{-5}$ |
| 14  | 40625514      | rs1954456  |                  |                   | $5.729 \times 10^{-5}$ |
| 14  | 40627078      | rs1959909  |                  |                   | $5.729 \times 10^{-5}$ |
| 6   | 46055426      | rs4714899  | <i>CLIC5</i>     | Intron            | $6.538 \times 10^{-5}$ |
| 14  | 26880311      | rs1456796  |                  |                   | $6.861 \times 10^{-5}$ |
| 20  | 48368185      | rs928072   | <i>LOC284751</i> | Downstream        | $6.939 \times 10^{-5}$ |
