# Supplementary material
Source: PubMed Central journal article supplement (PMC3070599)
Supplement: NIHMS278719-supplement-Suppl_Table_S3.pdf [file NIHMS278719-supplement-Suppl_Table_S3.pdf]

**Table S3. Thirty Most Significant Association Results From the Analysis of Alcohol Dependence in the Dutch NTR Sample**

| Chr | Location (bp) | SNP        | Gene             | SNP Type   | P-value                  |
|-----|---------------|------------|------------------|------------|--------------------------|
| 16  | 53144933      | rs16953659 |                  |            | 1.328 x 10 <sup>-6</sup> |
| 7   | 147159664     | rs851712   | <i>CNTNAP2</i>   | Intron     | 2.607 x 10 <sup>-6</sup> |
| 11  | 47933458      | rs7936879  |                  |            | 3.425 x 10 <sup>-6</sup> |
| 19  | 55443610      | rs11670669 | <i>MYH14</i>     | Intron     | 4.237 x 10 <sup>-6</sup> |
| 5   | 170302206     | rs7701805  | <i>RANBP17</i>   | Intron     | 4.945 x 10 <sup>-6</sup> |
| 11  | 48128941      | rs17198978 | <i>PTPRJ</i>     | Intron     | 5.455 x 10 <sup>-6</sup> |
| 3   | 82540820      | rs17019771 |                  |            | 7.083 x 10 <sup>-6</sup> |
| 18  | 29032084      | rs17667691 | <i>C18orf34</i>  | Intron     | 7.690 x 10 <sup>-6</sup> |
| 13  | 105448745     | rs4483718  |                  |            | 7.733 x 10 <sup>-6</sup> |
| 5   | 146655326     | rs13170855 | <i>STK32A</i>    | Intron     | 8.271 x 10 <sup>-6</sup> |
| 6   | 135121310     | rs7749709  |                  |            | 1.156 x 10 <sup>-5</sup> |
| 17  | 34317874      | rs82977    | <i>LASPI</i>     | Intron     | 1.190 x 10 <sup>-5</sup> |
| 14  | 76788374      | rs2287386  | <i>TMEM63C</i>   | Intron     | 1.233 x 10 <sup>-5</sup> |
| 21  | 23991310      | rs2828434  |                  |            | 1.325 x 10 <sup>-5</sup> |
| 11  | 73777540      | rs658126   | <i>PGM2L1</i>    | Intron     | 1.509 x 10 <sup>-5</sup> |
| 4   | 166365270     | rs12513327 | <i>KLHL2</i>     | Intron     | 1.645 x 10 <sup>-5</sup> |
| 5   | 54586456      | rs12523234 | <i>DHX29</i>     | Downstream | 1.728 x 10 <sup>-5</sup> |
| 5   | 54594729      | rs897669   | <i>DHX29</i>     | Intron     | 1.795 x 10 <sup>-5</sup> |
| 11  | 48473182      | rs7944287  | <i>OR4A47</i>    | Downstream | 1.864 x 10 <sup>-5</sup> |
| 11  | 46923384      | rs2903517  | <i>C11orf49</i>  | Intron     | 2.174 x 10 <sup>-5</sup> |
| 3   | 72626886      | rs10511022 |                  |            | 2.240 x 10 <sup>-5</sup> |
| 7   | 137927174     | rs7799136  | <i>LOC136306</i> | Downstream | 2.427 x 10 <sup>-5</sup> |
| 4   | 189484767     | rs11930915 |                  |            | 2.514 x 10 <sup>-5</sup> |
| 5   | 54735640      | rs12518892 | <i>SKIV2L2</i>   | Intron     | 2.533 x 10 <sup>-5</sup> |
| 5   | 54647490      | rs13154710 | <i>DHX29</i>     | Promoter   | 2.533 x 10 <sup>-5</sup> |
| 3   | 143743252     | rs7636909  | <i>ATR</i>       | Intron     | 2.686 x 10 <sup>-5</sup> |
| 2   | 211427130     | rs13002544 |                  |            | 3.016 x 10 <sup>-5</sup> |
| 5   | 54524581      | rs12109297 |                  |            | 3.533 x 10 <sup>-5</sup> |
| 2   | 86961722      | rs6709175  |                  |            | 3.617 x 10 <sup>-5</sup> |
| 7   | 47249414      | rs6463401  |                  |            | 3.673 x 10 <sup>-5</sup> |
